# Supplementary material
Source: MDPI journal article supplement (https://www.mdpi.com/2073-4395/12/5/1237)
Supplement: s1 [file s1]

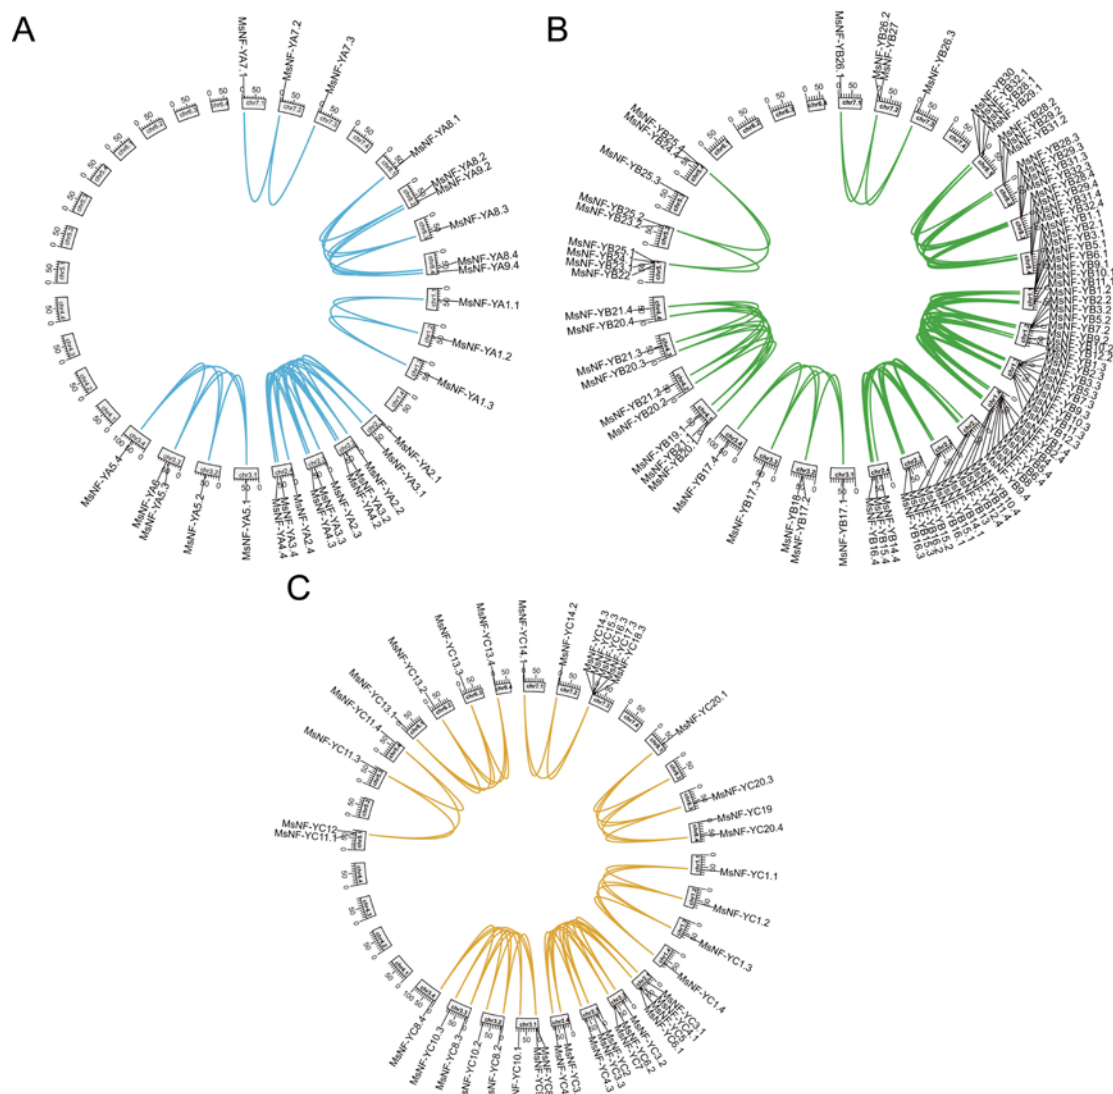

**Figure S1.** (A–C) Synteny and allelic relationship of *MsNF-Y* family genes.

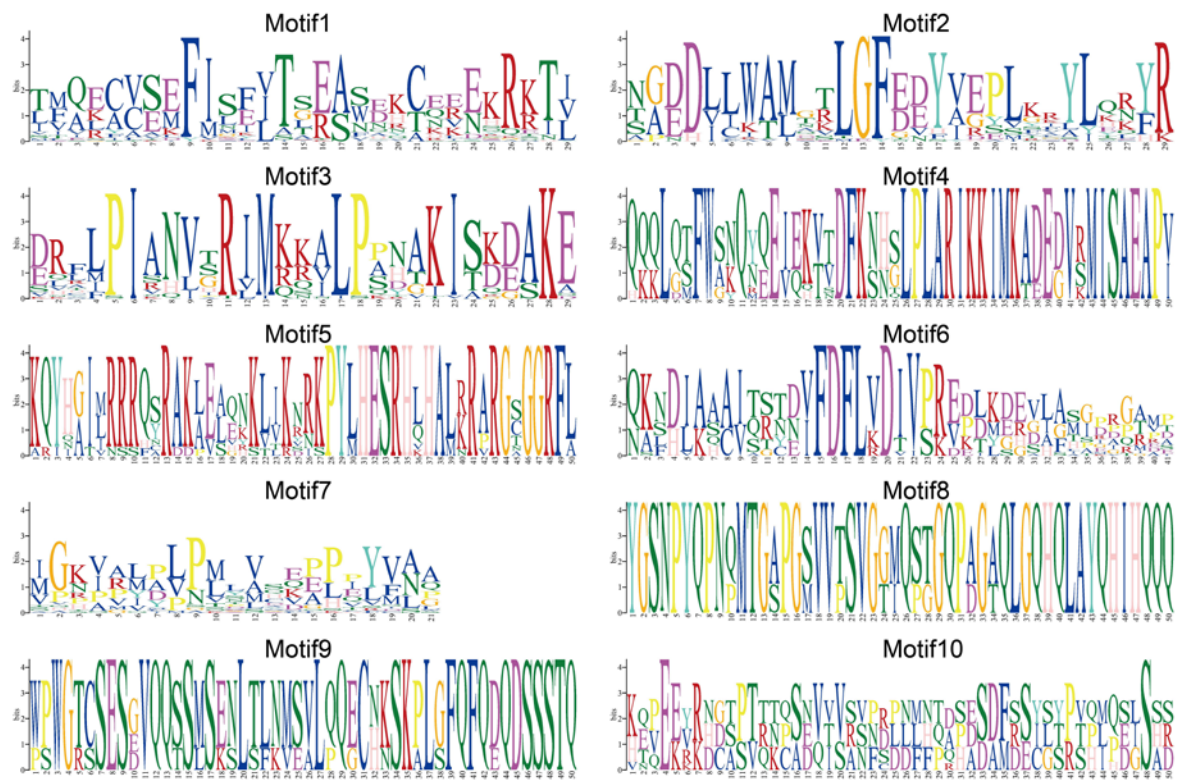

**Figure S2.** Schematic diagram of motifs of MsNF-Y proteins.
